# Supplementary material for: Epistatic genetic interactions govern morphogenesis during sexual reproduction and infection in a global human fungal pathogen
Source: bioRxiv or medRxiv preprint supplement (doi:10.1101/2021.12.09.472005), 2021-12-29

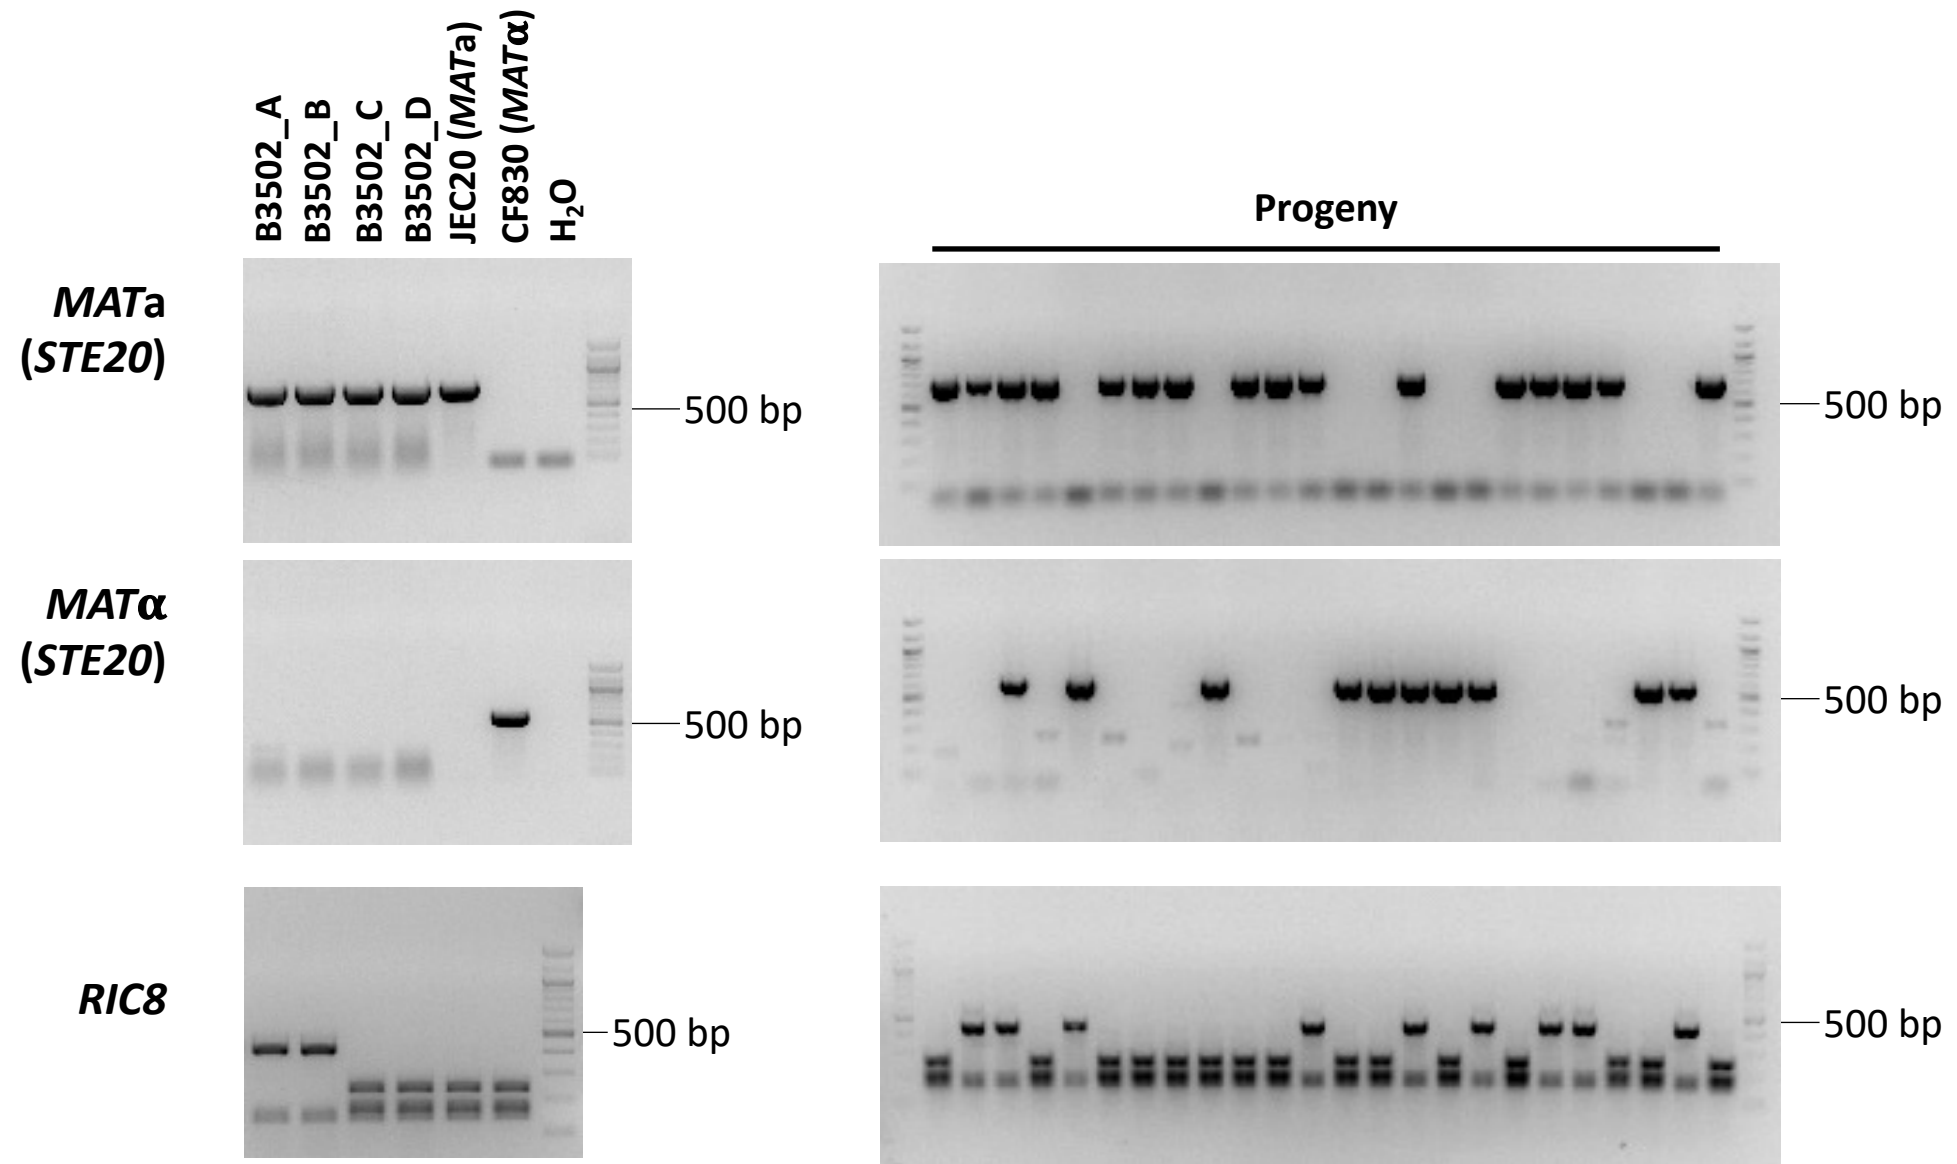

Supplement: Supplementary file [file media-2.pdf]
